# Supplementary material for: Structure determination of molecular nanocomposites by combining pair distribution function analysis and solid-state NMR
Source: Royal Society of Chemistry journal article supplement (doi:10.1039/c4ra11470a), 2014-12-15
Supplement: c4ra11470a1.pdf [file c4ra11470a1.pdf]

## SUPPLEMENTARY MATERIAL

In order to characterize the porosity of the undoped xerogels, nitrogen sorption isotherms were recorded at 77.35 K using a Quantachrome porosimeter Autosorb 1-LP-MP, after an outgassing process of several hours at 150°C under secondary vacuum. The shape of the isotherms and the type of hysteresis loops were interpreted using the model of Brunauer<sup>1</sup> and the correlations of De Boer respectively<sup>2</sup>. Specific surface area was determined by the Brunauer–Emmett–Teller (BET) method<sup>3</sup>. The total pore volume was determined at  $P/P_0 = 0.99938$ . The pore size diameter and distribution were calculated according to the Barrett–Joyner–Halenda (BJH)<sup>4</sup> model. The pore size distribution is thus given by the derivative of the desorbed volume as a function of the pore diameter.

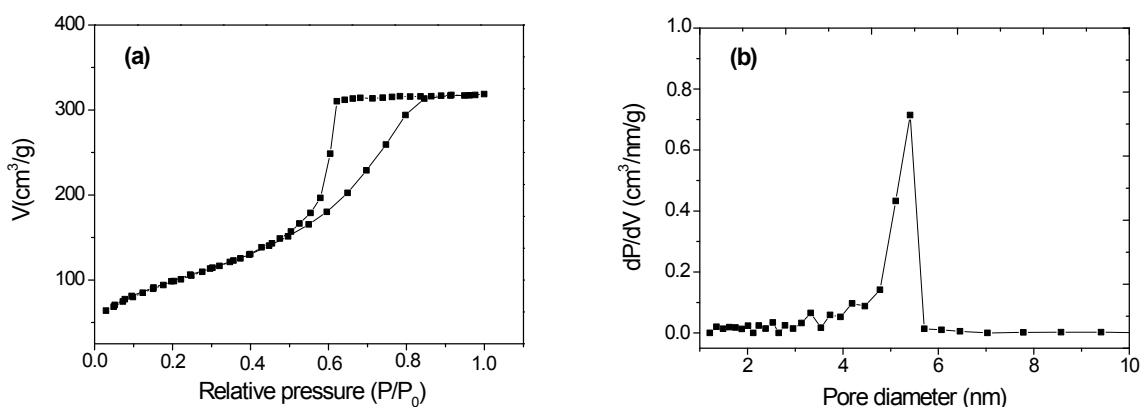

**Figure 1S.** (a)  $\text{N}_2$ -sorption isotherm and (b) BJH pore size (diameter) distribution of the undoped silica xerogel stabilized at 850 °C.

The nitrogen adsorption-desorption isotherm profile of undoped silica xerogel heat-treated at 850°C (Figure 1S (a)) corresponds to a type IV curve, which reveals a mesoporous structure. According to the IUPAC classification<sup>5</sup>, the hysteresis loop has a H2 character, which matches mesoporous solids with pore inter-connectivity. Thus, the undoped silica xerogel exhibited interconnected pores of mean diameter 5.8 nm with a narrow size distribution, deduced by the BJH model (Figure 1S (b)). The total pore volume is  $0.49 \text{ cm}^3\text{g}^{-1}$ . The specific surface area was determined by the BET method and was found to be around  $360 \text{ m}^2\text{g}^{-1}$ .

<sup>1</sup> S. Brunauer, P. H. Emmett and E. Teller, *J. Am. Chem. Soc.*, 1938, **60**, 309–319.

<sup>2</sup> J. De Boer, *The Structure and properties of porous materials*, Butterworth, London, 1985.

<sup>3</sup> S. Brunauer, L. S. Deming, W. E. Deming and E. Teller, *J. Am. Chem. Soc.*, 1940, **62**, 1723–1732.

<sup>4</sup> E. P. Barret, L. G. Joyner and P. P. Halenda, *J. Am. Chem. Soc.*, 1951, **73**, 373–380.

<sup>5</sup> K. S. Sing, D. Everett, R. A. Haul, L. Moscou, R. Pierotti, J. Rouquerol and T. Siemieniowska, *Pure Appl. Chem.*, 1985, **57**, 603–619.
